# Supplementary material for: The impact of highly effective modulator therapy on sinusitis and dysosmia in young children with cystic fibrosis: a prospective study protocol
Source: PubMed Central journal article supplement — ERJ Open Res. 2025 Jan 13;11(1):00137-2024. doi: 10.1183/23120541.00137-2024 (PMC11726580; doi:10.1183/23120541.00137-2024), 2025-01-13
Supplement: 00137-2024.SUPPLEMENT.pdf [file 00137-2024.SUPPLEMENT.pdf]

**Supplementary Table 1:** Sample size calculation for sufficient statistical power. Cohen's f effect size is defined as a small effect size as 0.14, a medium effect size as 0.25, and a large effect size as 0.40.

| <b>Aim and End-point Type</b>       | <b>Outcome(s). For each aim, outcomes are shown for CRS and olfactory function</b>                                                                              | <b>Adjusted significance level</b> | <b>Power</b> | <b>Time points</b> | <b>Detectable effect size (Cohen's f)</b> |
|-------------------------------------|-----------------------------------------------------------------------------------------------------------------------------------------------------------------|------------------------------------|--------------|--------------------|-------------------------------------------|
| <i>Aim 1<br/>Co-primary</i>         | <ul style="list-style-type: none"> <li>• Percent sinus opacification</li> <li>• Olfactory bulb volume</li> </ul>                                                | 0.025                              | 80%          | 3                  | 0.18                                      |
| <i>Aim 1<br/>Secondary</i>          | <ul style="list-style-type: none"> <li>• SN-5 scores;</li> <li>• PSW scores, BQOD scores, olfactory cleft opacification</li> </ul>                              | 0.013                              | 80%          | 3                  | 0.19                                      |
| <i>Aims 2 &amp; 3<br/>Primary</i>   | <ul style="list-style-type: none"> <li>• Improvement in % sinus opacification</li> <li>• Improvement in olfactory bulb volume</li> </ul>                        | 0.025                              | 80%          | 3                  | 0.18                                      |
| <i>Aims 2 &amp; 3<br/>Secondary</i> | <ul style="list-style-type: none"> <li>• Improvement in SN-5 scores</li> <li>• Improvement in PSW scores, BQOD scores, olfactory cleft opacification</li> </ul> | 0.013                              | 80%          | 3                  | 0.19                                      |

**Abbreviations:** SN-5: Sinonasal 5, PSW: Pediatric Smell Wheel, BQOD: Brief Questionnaire of Olfactory Disorders.
